# Supplementary material
Source: PubMed Central journal article supplement (PMC7200301)

Figure S2

A: 12 dynes/cm<sup>2</sup> Conditions

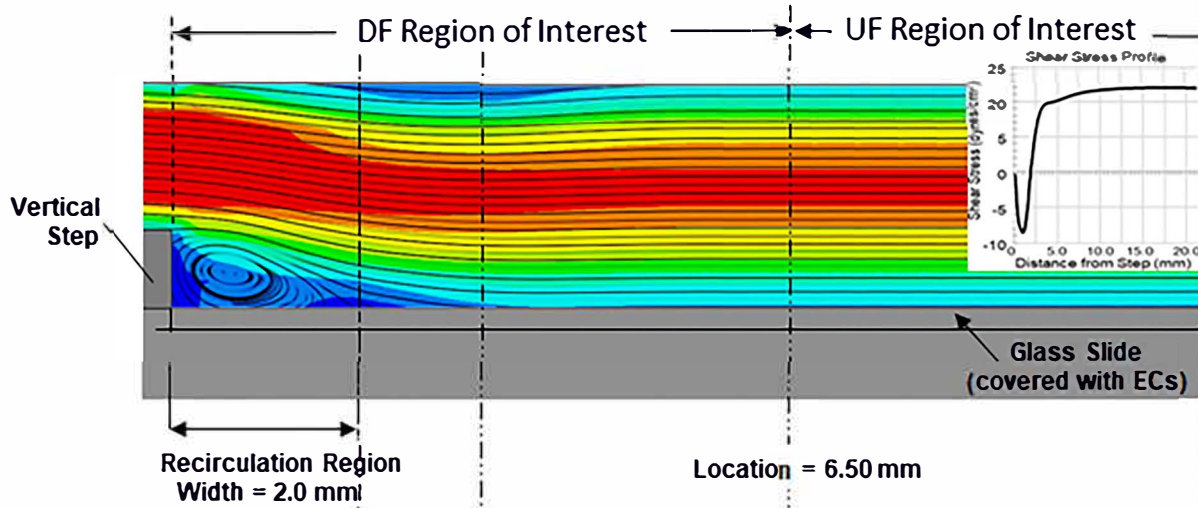

B: 1 dynes/cm<sup>2</sup> Conditions

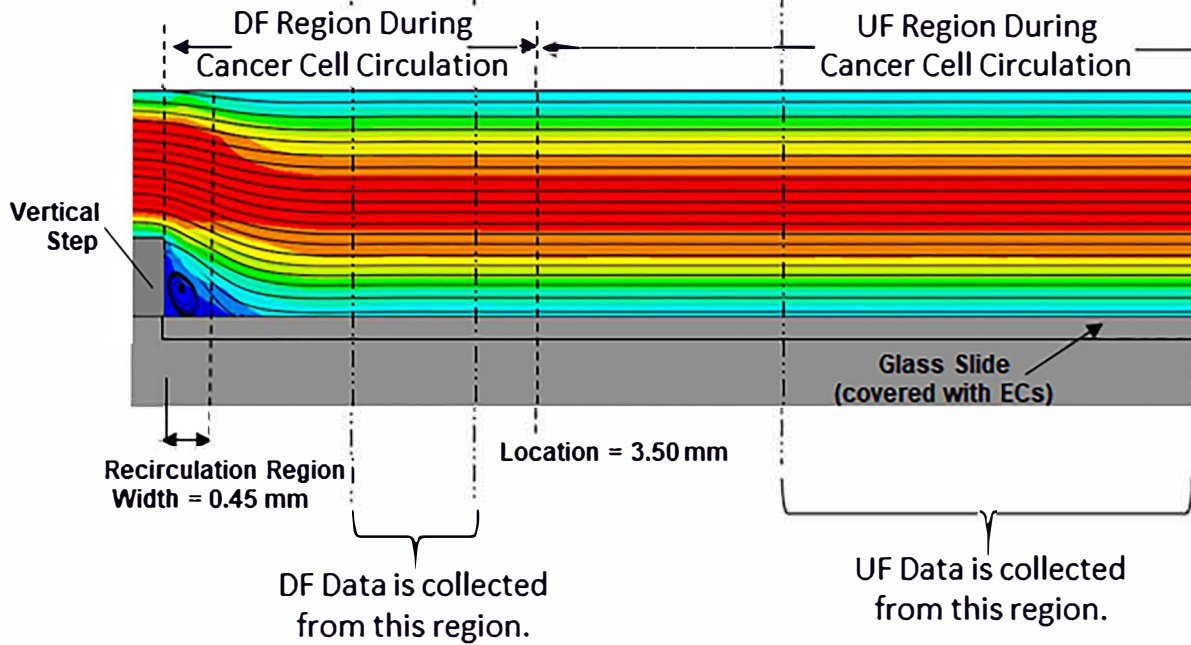

C: Control Studies: 1 dynes/cm<sup>2</sup> DF Region Does Not Enhance Flow-Regulated CTC Attachment

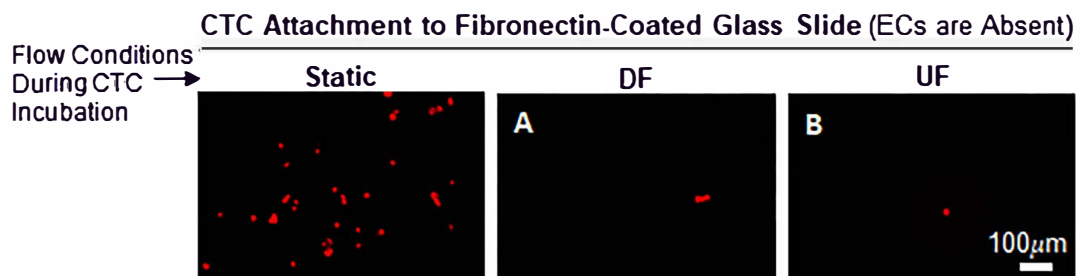

Supplement: NIHMS1573709-supplement-Supp_FigS2.pdf [file NIHMS1573709-supplement-Supp_FigS2.pdf]
