# Supplementary material
Source: PubMed Central journal article supplement (PMC7200301)

Figure S1

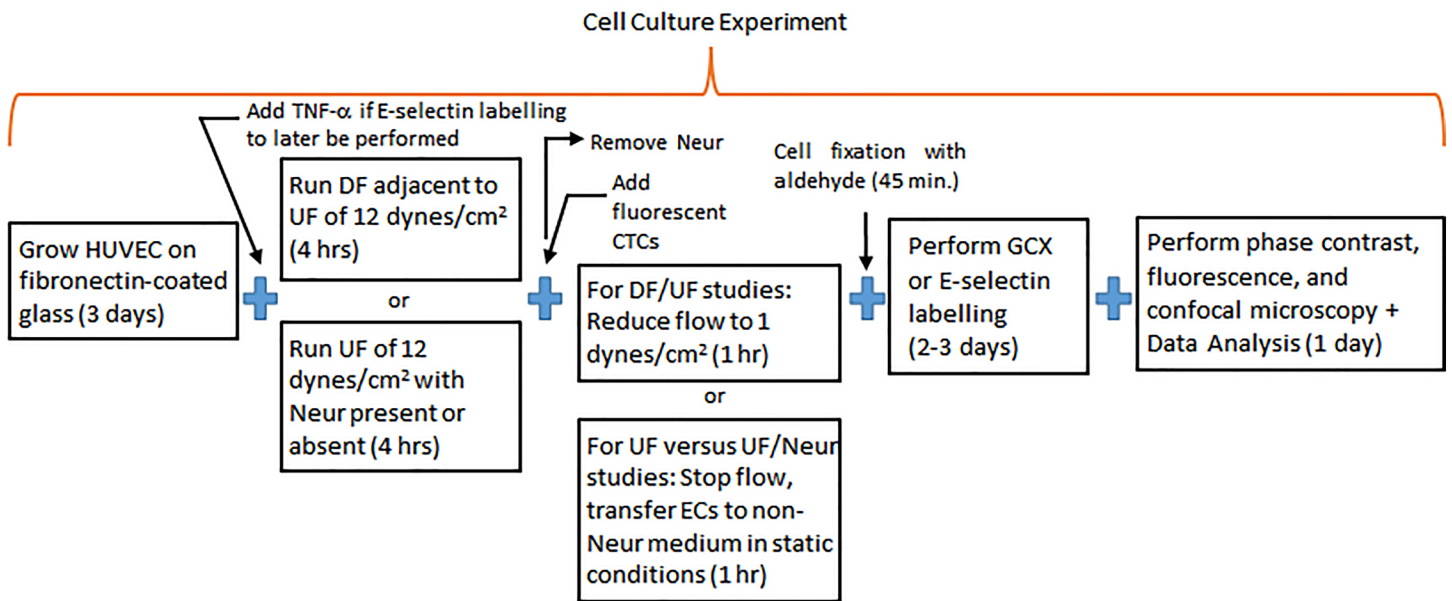

Supplement: NIHMS1573709-supplement-Supp_FigS1.pdf [file NIHMS1573709-supplement-Supp_FigS1.pdf]

Figure S3

HUVEC in No-Flow Conditions

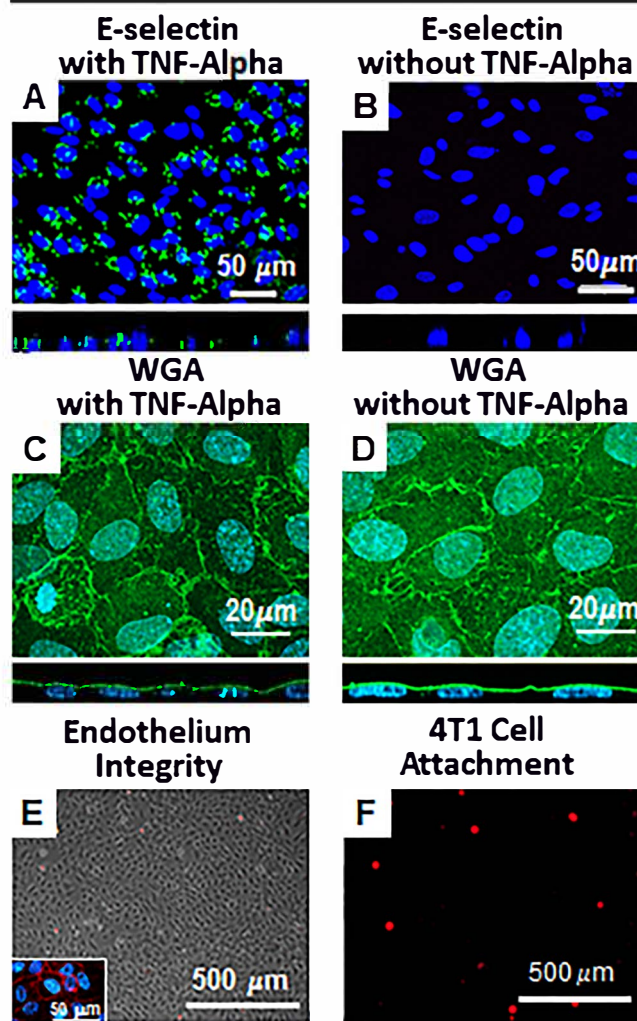

Supplement: NIHMS1573709-supplement-Supp_FigS3.pdf [file NIHMS1573709-supplement-Supp_FigS3.pdf]

Figure S4

WGA on HUVEC is degraded by Neur in a dose dependent manner.

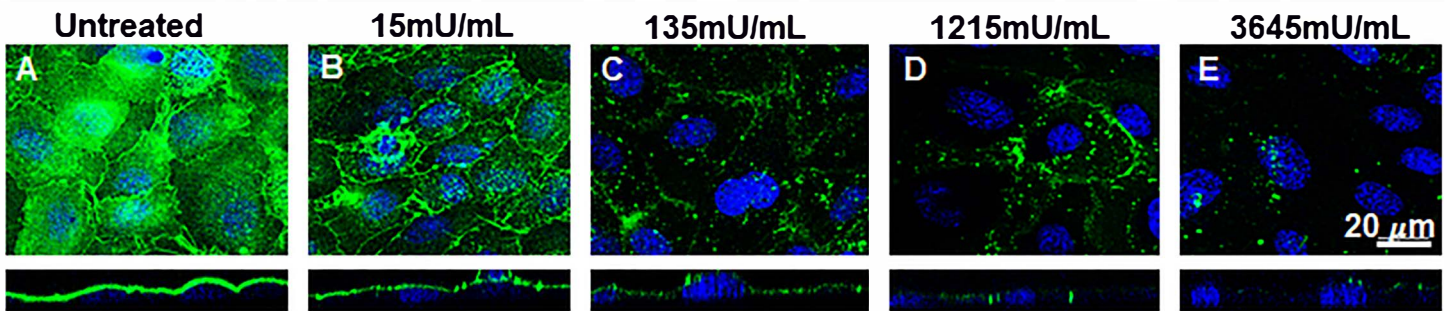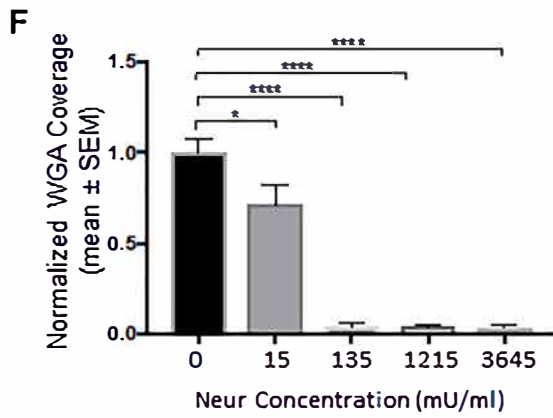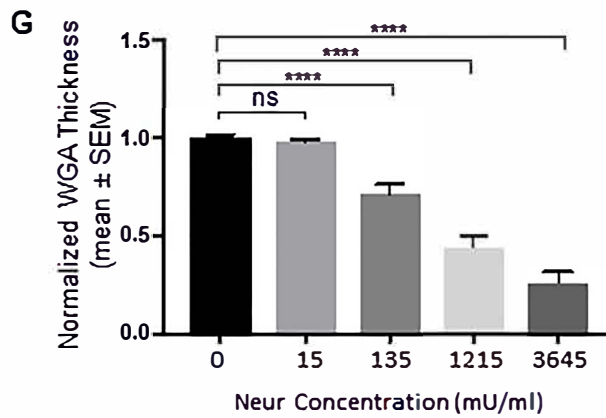

Supplement: NIHMS1573709-supplement-Supp_FigS4.pdf [file NIHMS1573709-supplement-Supp_FigS4.pdf]

Figure S5

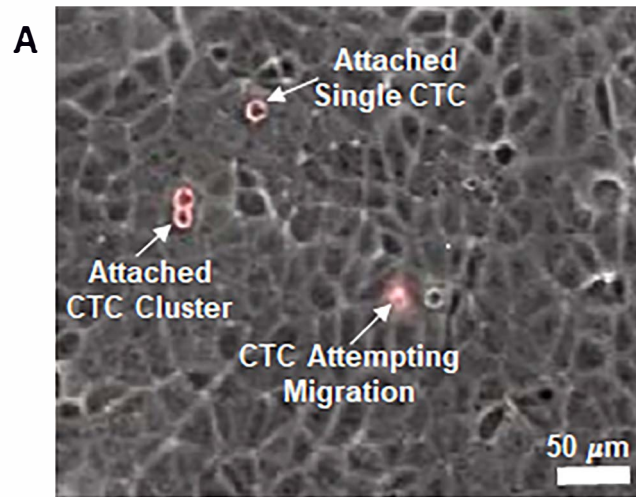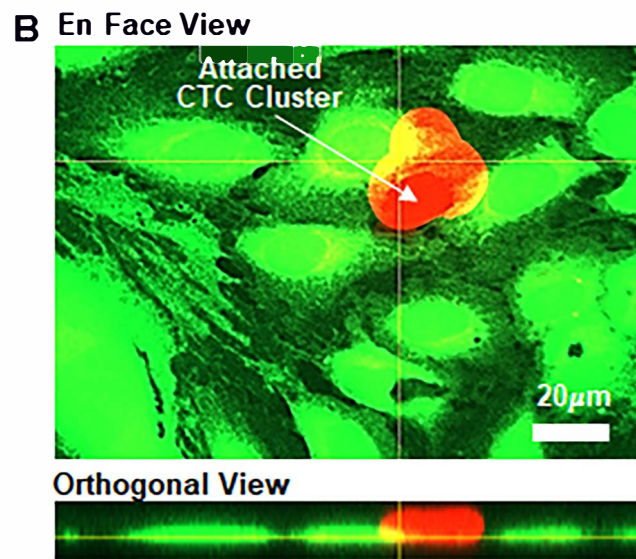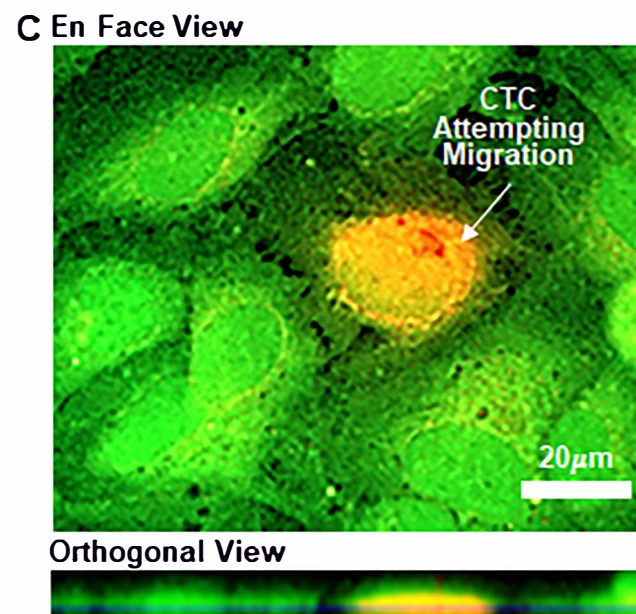

Supplement: NIHMS1573709-supplement-Supp_FigS5.pdf [file NIHMS1573709-supplement-Supp_FigS5.pdf]

Figure S6

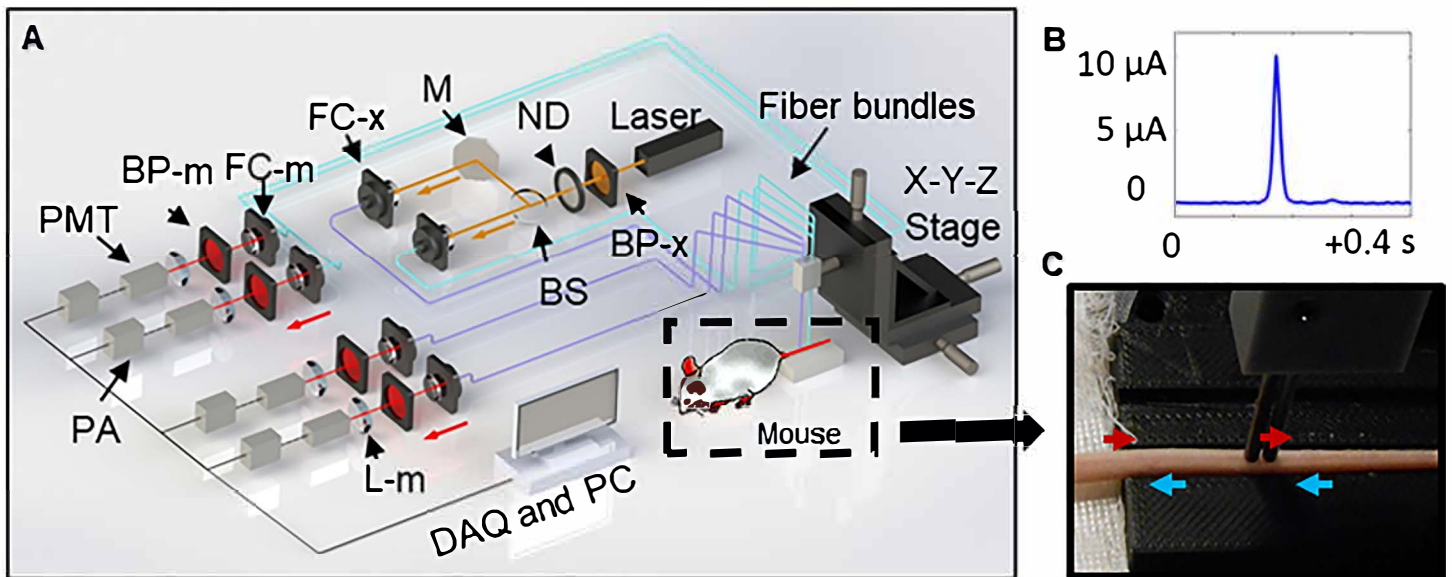

Supplement: NIHMS1573709-supplement-Supp_FigS6.pdf [file NIHMS1573709-supplement-Supp_FigS6.pdf]

Figure S7

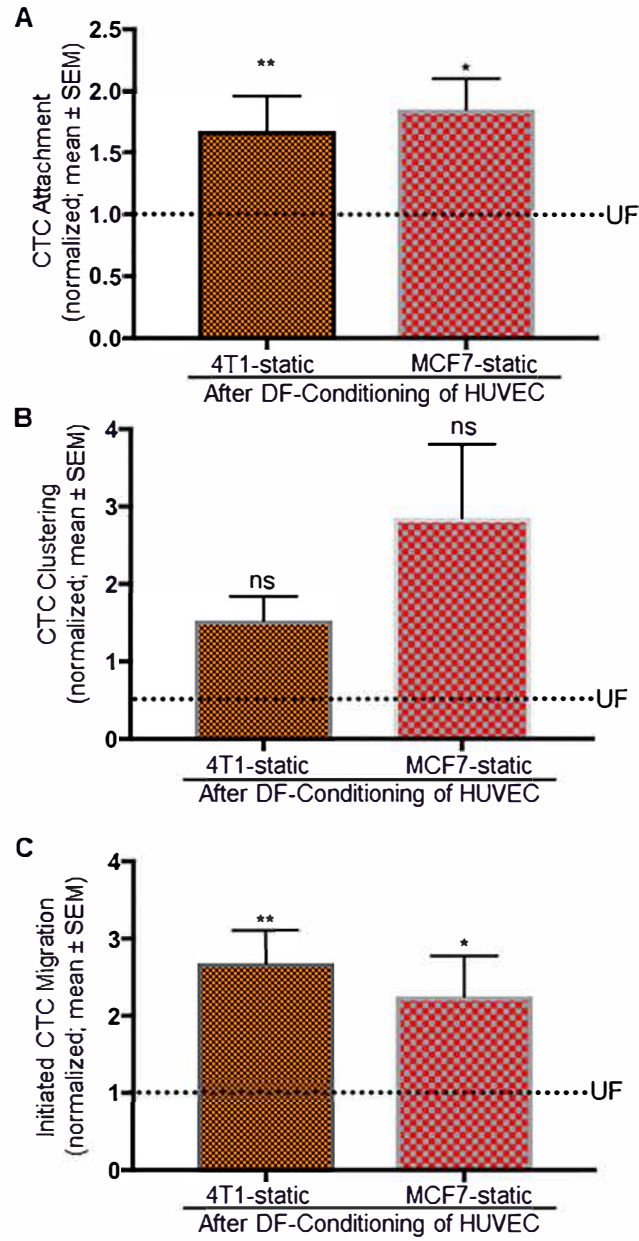

Supplement: NIHMS1573709-supplement-Supp_FigS7.pdf [file NIHMS1573709-supplement-Supp_FigS7.pdf]

: ] i fY G,

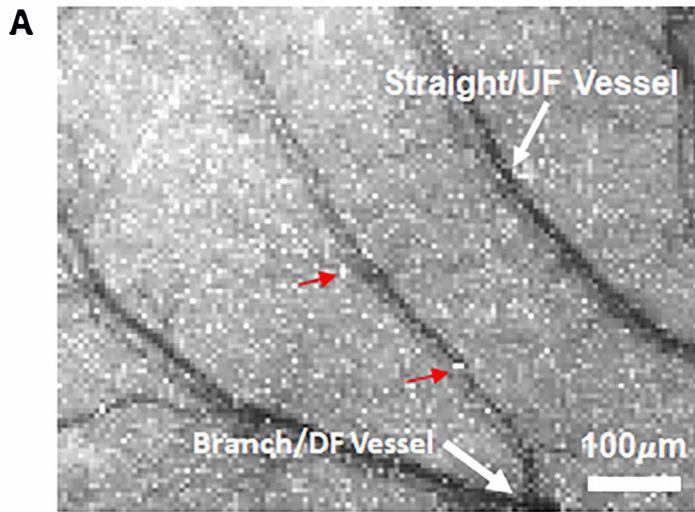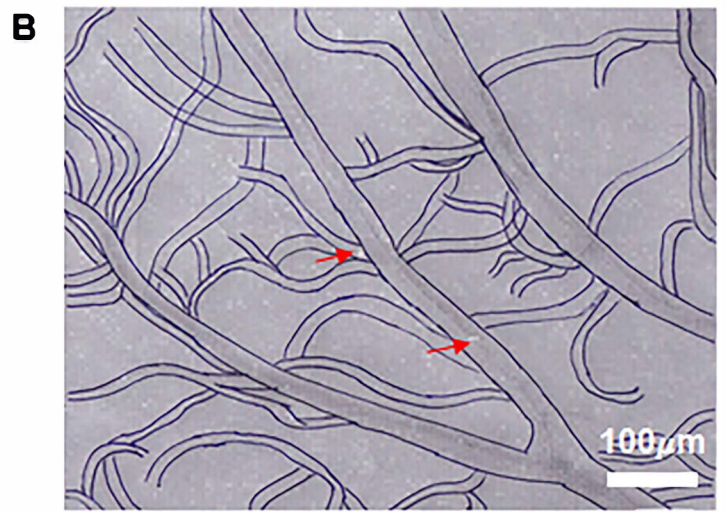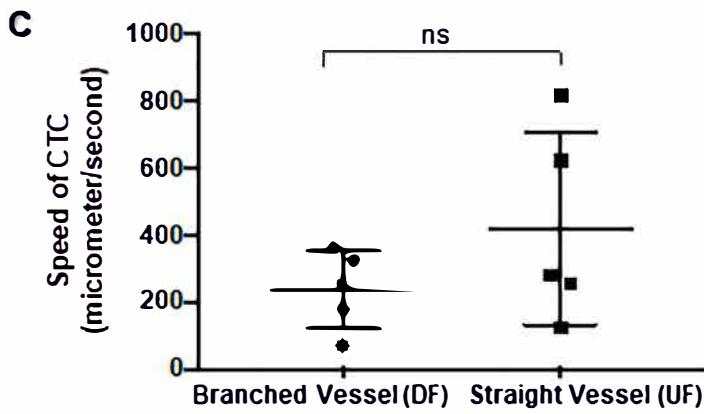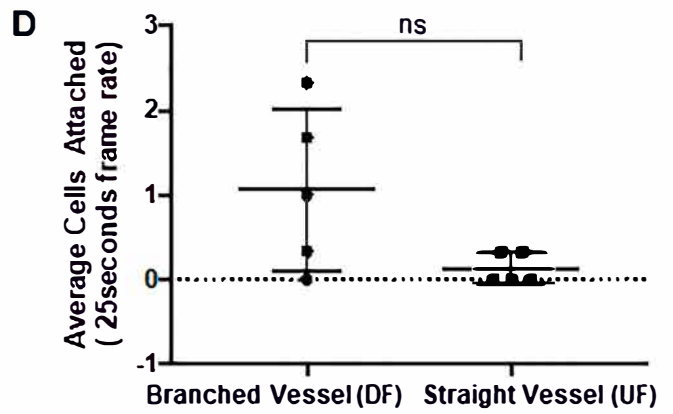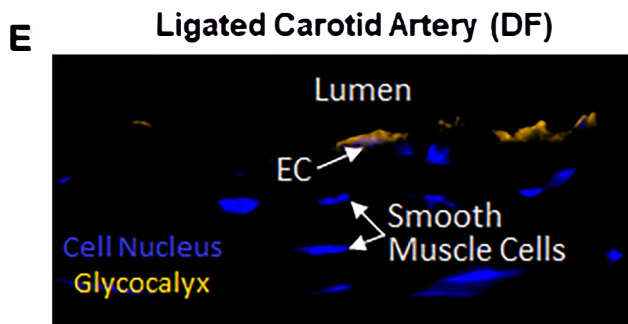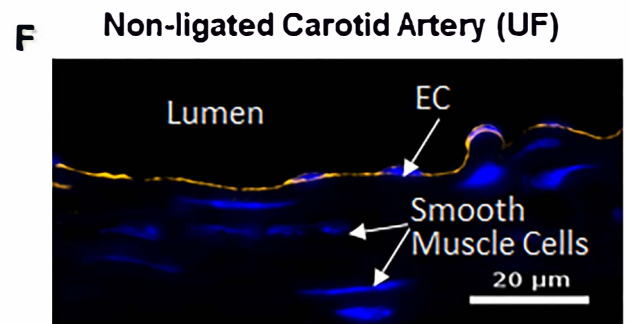

Supplement: NIHMS1573709-supplement-Supp_FigS8.pdf [file NIHMS1573709-supplement-Supp_FigS8.pdf]
